# Supplementary material
Source: MDPI journal article supplement (https://www.mdpi.com/2077-1312/11/3/520)
Supplement: s1 [file s1]

Supplementary information

# Fabrication of fluorine-free electrodeposited superhydrophobic surface on aluminum substrate for corrosion protection and drag reduction

Jingguo Fu<sup>1</sup>, Yihe Sun<sup>1</sup>, Jingye Wang<sup>1</sup>, Jifeng Zhang<sup>1</sup> and Yulong Ji<sup>1,\*</sup>

1. Department of Marine Engineering, Dalian Maritime University, Liaoning Dalian, China

\* Correspondence: Yulong Ji, E-mail: jiyulong@dmlu.edu.cn; Tel: +008641184724306

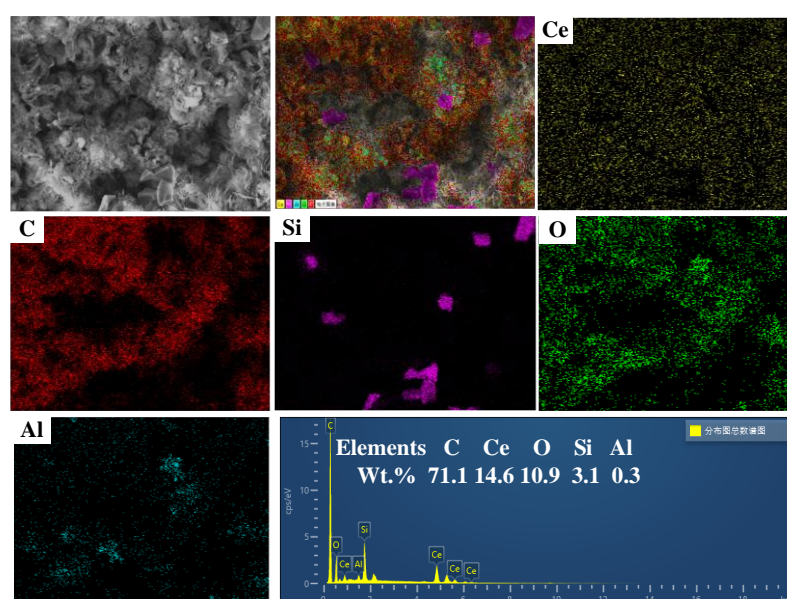

Figure S1. The EDS results of the surface of the ED1 sample.

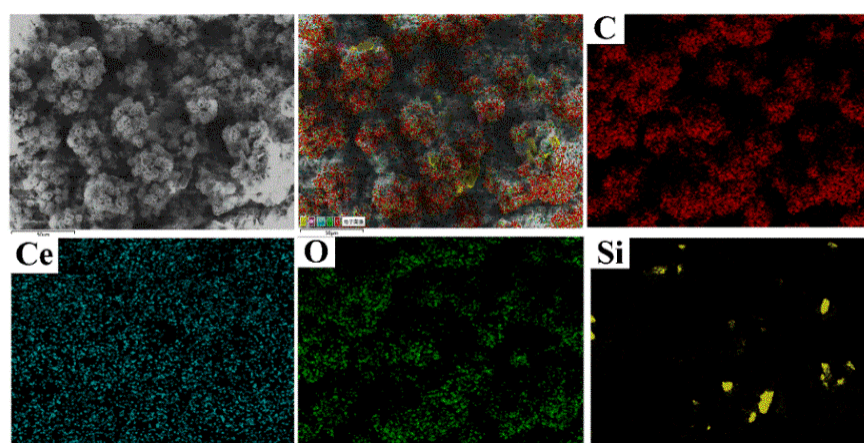

Figure S2. The EDS results of the ED2 surface.

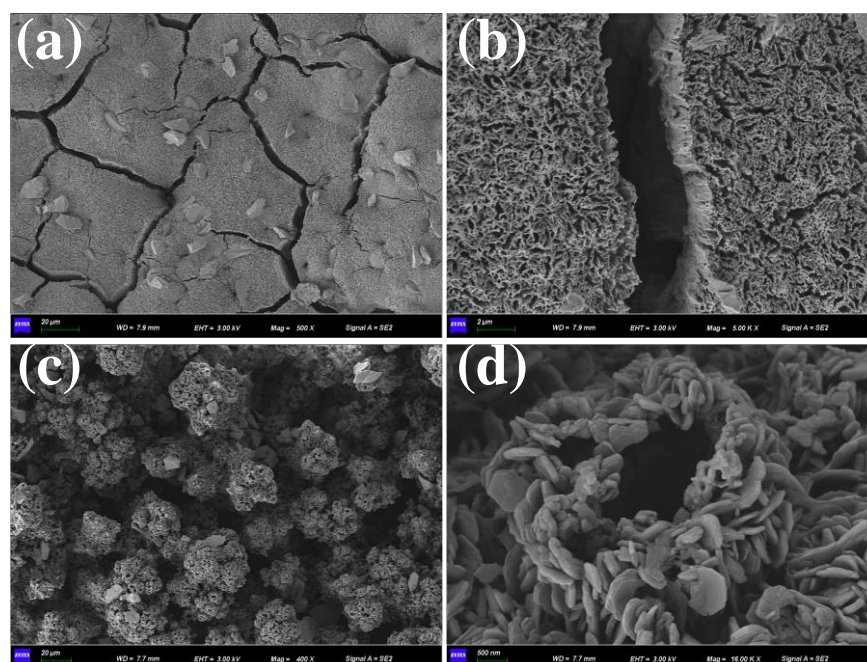

**Figure S3.** The surface morphologies of sample; (a, b) the surface morphologies of the first-step electrodeposited surface of the ED2 sample; (c, d) the surface morphologies of the second step electrodeposited surface of the ED2 sample.

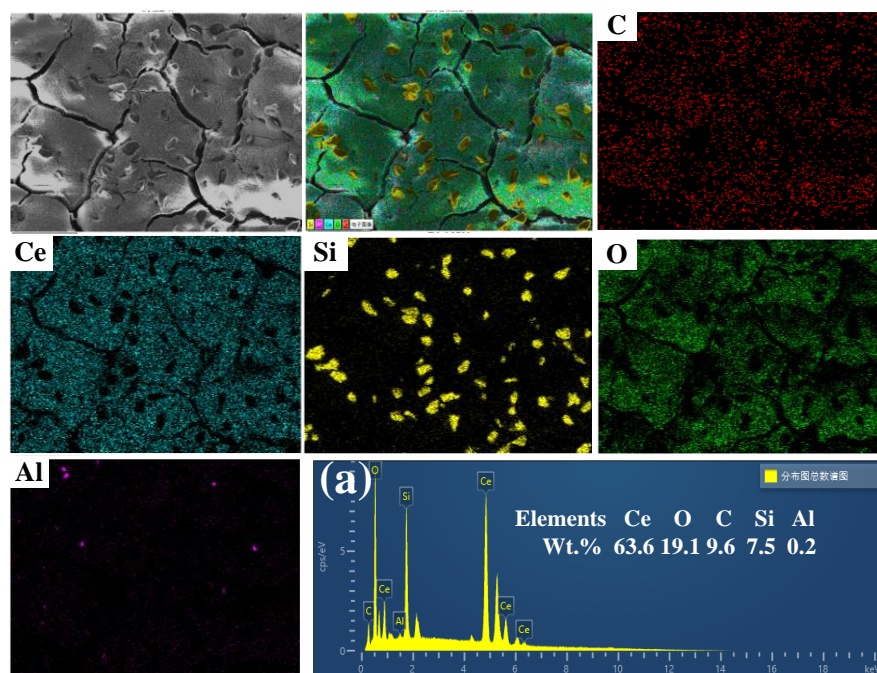

**Figure S4.** The EDS results of the first step electrodeposited surface of the ED2 sample.

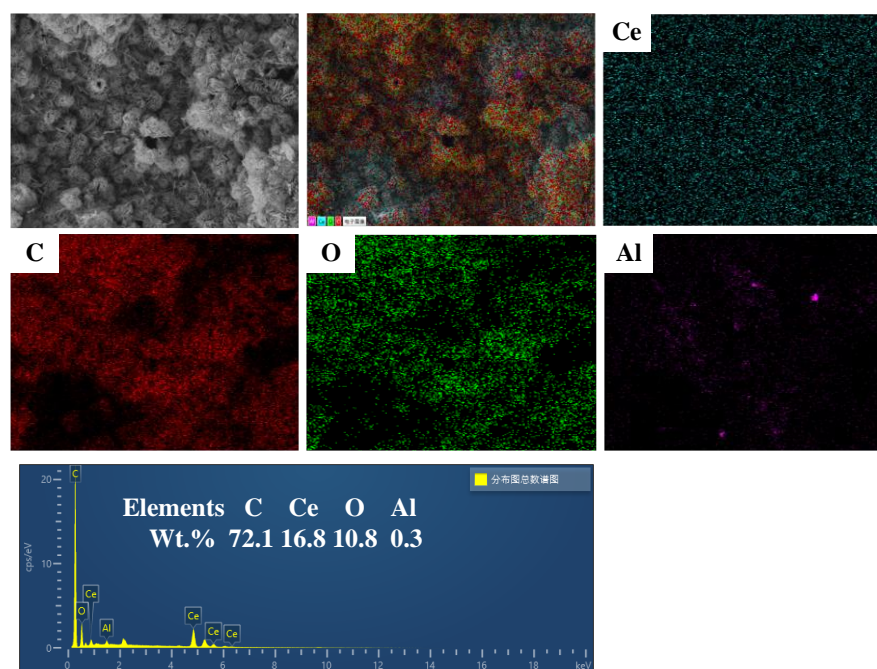

**Figure S5.** The EDS results of the surface of the ED3 sample.

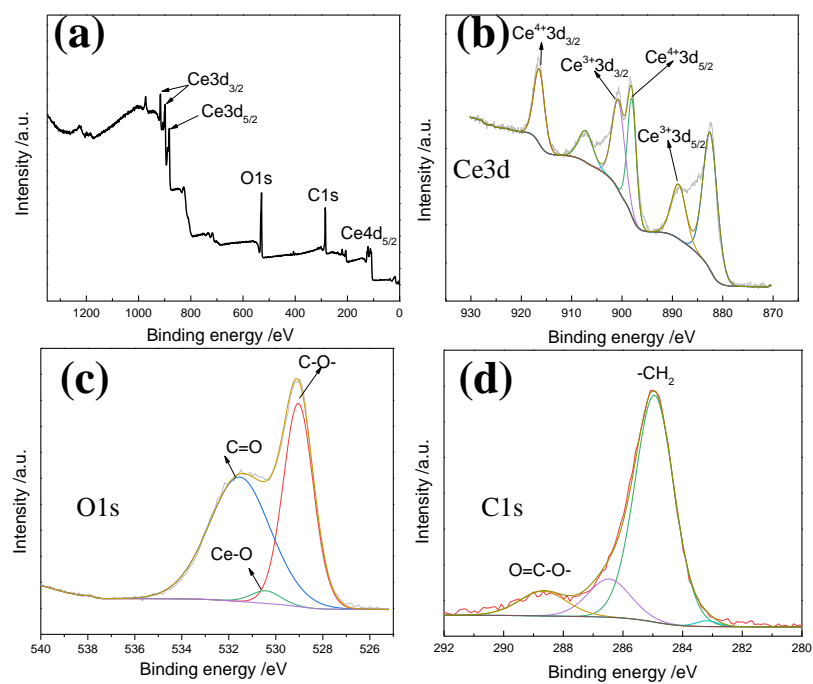

**Figure S6.** The XPS results of first step electrodeposited surface of the ED2 sample.

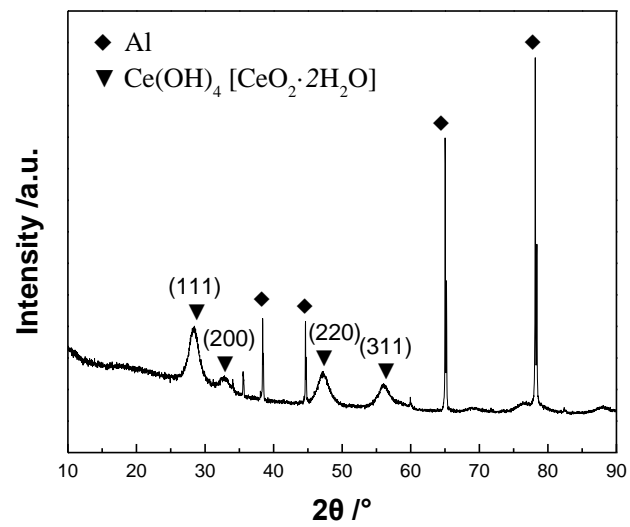

**Figure S7.** The XRD results of first step electrodeposited surface of the ED2 sample.
